# Supplementary figures and images for: Distance decay and persistent health care disparities in South Africa
Source: Springer Nature journal article supplement (doi:10.1186/s12913-014-0541-1), 2014-11-03

Health consultation in last year by distance to closest clinic

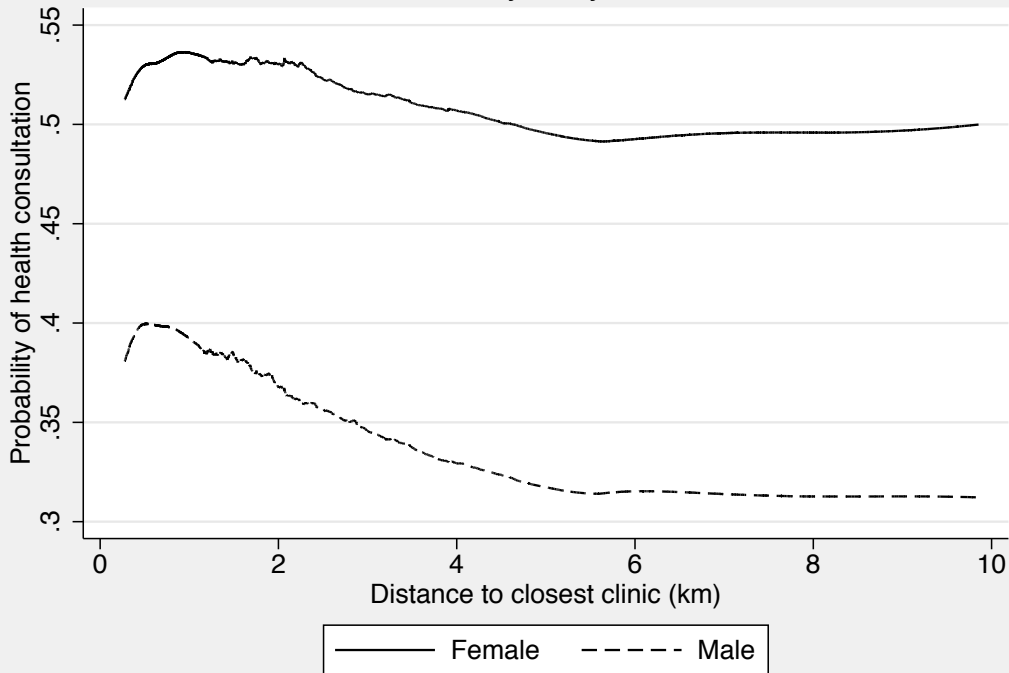

Supplement: MOESM2 [file 9756670]

Doctor or nurse present at birth by distance to closest clinic

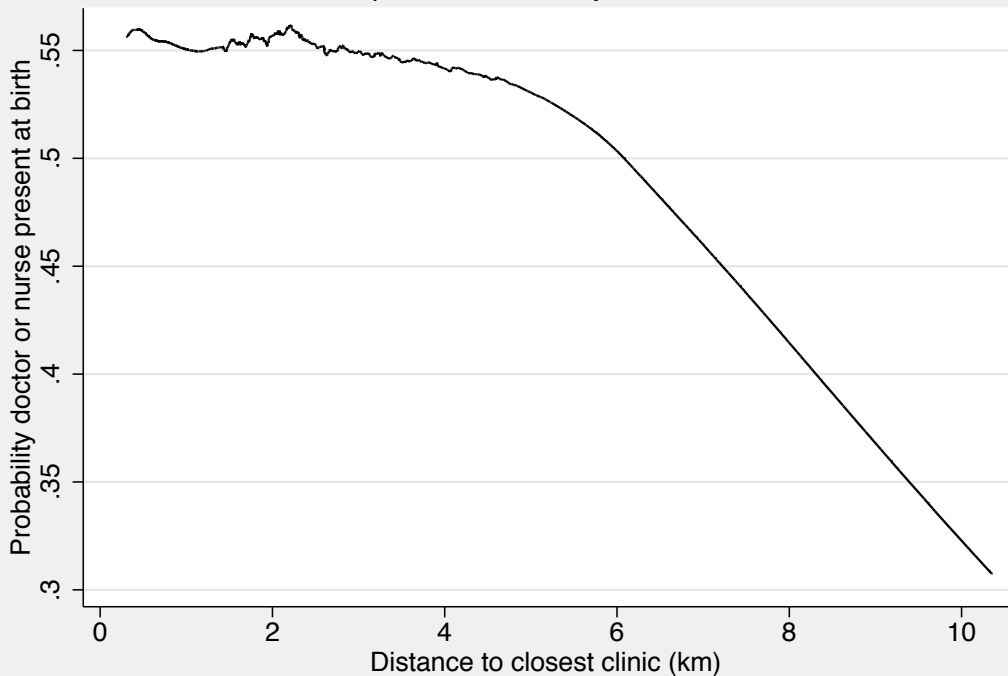

Supplement: MOESM3 [file 9756670]
